# Supplementary material
Source: PubMed Central journal article supplement (PMC4667375)
Supplement: aasm.38.12.1995s1.pdf [file aasm.38.12.1995s1.pdf]

**Table S1. Prediction of new cases of excessive daytime sleepiness from changes within variables over time in women younger and older than 40 years and 50 years at baseline, respectively. Results from age-stratified multivariate logistic regression analyses.**

|                                  | Younger than 40 y<br>Adj. OR (95% CI) <sup>a</sup><br>(n = 1,868 ) | Younger than 50 y<br>Adj. OR (95% CI) <sup>a</sup><br>(n = 2,729 ) | Older than 40 y<br>Adj. OR (95% CI) <sup>a</sup><br>(n = 2,454 ) | Older than 50 y<br>Adj. OR (95% CI) <sup>a</sup><br>(n = 1,593 ) |
|----------------------------------|--------------------------------------------------------------------|--------------------------------------------------------------------|------------------------------------------------------------------|------------------------------------------------------------------|
| <b>Insomnia</b>                  |                                                                    |                                                                    |                                                                  |                                                                  |
| - No-No                          | 1                                                                  | 1                                                                  | 1                                                                | 1                                                                |
| - No-Yes ("Incident")            | <b>4.45 (2.80-7.07)</b>                                            | <b>5.24 (3.62-7.58)</b>                                            | <b>6.06 (3.78-9.74)</b>                                          | <b>4.71 (2.28-9.74)</b>                                          |
| - Yes-No ("Remitted")            | 1.55 (0.80-3.01)                                                   | 1.48 (0.81-2.71)                                                   | 0.96 (0.38-2.41)                                                 | 0.94 (0.32-2.74)                                                 |
| - Yes-Yes ("Persistent")         | <b>3.86 (2.08-7.16)</b>                                            | <b>5.31 (3.29-8.56)</b>                                            | <b>5.05 (2.88-8.84)</b>                                          | <b>3.16 (1.41-7.06)</b>                                          |
| <b>Anxiety and/or depression</b> |                                                                    |                                                                    |                                                                  |                                                                  |
| - No-No                          | 1                                                                  | 1                                                                  | 1                                                                | 1                                                                |
| - No-Yes ("Incident")            | <b>3.57 (2.09-6.11)</b>                                            | <b>3.34 (2.11-5.29)</b>                                            | <b>4.22 (2.16-8.25)</b>                                          | <b>4.08 (1.55-10.7)</b>                                          |
| - Yes-No ("Remitted")            | <b>3.52 (1.98-6.25)</b>                                            | <b>2.95 (1.81-4.82)</b>                                            | 1.66 (0.81-3.42)                                                 | 1.60 (0.55-4.68)                                                 |
| - Yes-Yes ("Persistent")         | <b>7.92 (4.29-14.6)</b>                                            | <b>5.62 (3.35-9.41)</b>                                            | <b>3.02 (1.51-6.05)</b>                                          | <b>4.38 (1.68-11.4)</b>                                          |
| <b>Somatic disease</b>           |                                                                    |                                                                    |                                                                  |                                                                  |
| - No-No                          | 1                                                                  | 1                                                                  | 1                                                                | 1                                                                |
| - No-Yes ("Incident")            | <b>2.29 (1.38-3.80)</b>                                            | <b>1.85 (1.20-2.87)</b>                                            | 1.39 (0.74-2.61)                                                 | 1.29 (0.51-3.26)                                                 |
| - Yes-No ("Remitted")            | 0.51 (0.19-1.40)                                                   | 0.85 (0.42-1.71)                                                   | 0.94 (0.38-2.35)                                                 | 0.26 (0.03-2.16)                                                 |
| - Yes-Yes ("Persistent")         | 1.03 (0.53-2.00)                                                   | 1.25 (0.74-2.11)                                                   | 1.81 (0.94-3.48)                                                 | 1.50 (0.60-3.75)                                                 |
| <b>Regular medication</b>        |                                                                    |                                                                    |                                                                  |                                                                  |
| - No-No                          | 1                                                                  | 1                                                                  | 1                                                                | 1                                                                |
| - No-Yes ("Incident")            | 1.64 (0.96-2.80)                                                   | <b>1.65 (1.05-2.60)</b>                                            | <b>2.05 (1.01-4.18)</b>                                          | 2.29 (0.64-8.14)                                                 |
| - Yes-No ("Remitted")            | 0.94 (0.50-1.77)                                                   | 1.12 (0.65-1.92)                                                   | 1.90 (0.74-4.87)                                                 | 2.17 (0.42-11.1)                                                 |
| - Yes-Yes ("Persistent")         | 1.44 (0.79-2.62)                                                   | 1.36 (0.82-2.26)                                                   | 1.91 (0.90-4.06)                                                 | 3.43 (0.96-12.2)                                                 |
| <b>Snoring</b>                   |                                                                    |                                                                    |                                                                  |                                                                  |
| - No-No                          | 1                                                                  | 1                                                                  | 1                                                                | 1                                                                |
| - No-Yes ("Incident")            | <b>2.18 (1.01-4.70)</b>                                            | <b>2.06 (1.17-3.63)</b>                                            | 1.69 (0.87-3.29)                                                 | 1.37 (0.45-4.17)                                                 |
| - Yes-No ("Remitted")            | 1.50 (0.51-4.43)                                                   | 1.25 (0.51-3.08)                                                   | 1.28 (0.56-2.93)                                                 | 1.49 (0.55-4.04)                                                 |
| - Yes-Yes ("Persistent")         | 1.50 (0.51-4.43)                                                   | 0.23 (0.05-1.05)                                                   | 1.21 (0.54-2.68)                                                 | <b>3.27 (1.25-8.56)</b>                                          |
| <b>Obesity</b>                   |                                                                    |                                                                    |                                                                  |                                                                  |
| - No-No                          | 1                                                                  | 1                                                                  | 1                                                                | 1                                                                |
| - No-Yes ("Incident")            | 1.64 (0.92-2.93)                                                   | 1.49 (0.92-2.41)                                                   | 1.81 (0.98-3.33)                                                 | <b>2.78 (1.16-6.62)</b>                                          |
| - Yes-No ("Remitted")            | N/A <sup>b</sup>                                                   | 0.44 (0.05-3.58)                                                   | 0.84 (0.24-2.97)                                                 | 0.89 (0.18-4.37)                                                 |
| - Yes-Yes ("Persistent")         | 0.75 (0.36-1.59)                                                   | 0.80 (0.46-1.40)                                                   | 1.22 (0.70-2.13)                                                 | 1.16 (0.55-2.44)                                                 |
| <b>Smoking</b>                   |                                                                    |                                                                    |                                                                  |                                                                  |
| - No-No                          | 1                                                                  | 1                                                                  | 1                                                                | 1                                                                |
| - No-Yes ("Incident")            | <b>7.98 (2.79-22.8)</b>                                            | <b>5.06 (2.13-12.0)</b>                                            | 2.63 (0.63-10.9)                                                 | 2.36 (0.21-26.4)                                                 |

|                                   |                         |                         |                         |                         |
|-----------------------------------|-------------------------|-------------------------|-------------------------|-------------------------|
| - Yes-No ("Remitted")             | 1.23 (0.65-2.31)        | 0.91 (0.53-1.57)        | <b>0.35 (0.14-0.88)</b> | <b>0.21 (0.04-0.98)</b> |
| - Yes-Yes ("Persistent")          | 1.88 (0.90-3.95)        | 1.13 (0.62-2.07)        | 0.48 (0.21-1.06)        | 0.61 (0.19-1.95)        |
| High physical activity            |                         |                         |                         |                         |
| - No-No                           | 1                       | 1                       | 1                       | 1                       |
| - No-Yes ("Increased")            | 0.60 (0.31-1.15)        | 0.77 (0.46-2.07)        | 1.00 (0.48-2.07)        | 0.39 (0.19-1.95)        |
| - Yes-No ("Decreased")            | 0.81 (0.47-1.38)        | 0.82 (0.51-1.30)        | 1.27 (0.62-2.61)        | 1.35 (0.47-3.86)        |
| - Yes-Yes                         | 1.10 (0.61-1.98)        | 0.95 (0.56-1.59)        | 0.57 (0.19-1.69)        | 0.36 (0.04-3.30)        |
| Full-time work                    |                         |                         |                         |                         |
| - No-No                           | 1                       | 1                       | 1                       | 1                       |
| - No-Yes ("Increased")            | <b>0.40 (0.23-0.68)</b> | <b>0.52 (0.33-0.81)</b> | 1.52 (0.73-3.15)        | 1.20 (0.20-7.01)        |
| - Yes-No ("Decreased")            | 0.76 (0.43-1.36)        | 0.65 (0.39-1.06)        | 0.88 (0.50-1.52)        | 1.13 (0.57-2.24)        |
| - Yes-Yes                         | 0.61 (0.36-1.03)        | <b>0.66 (0.44-0.99)</b> | 1.14 (0.67-1.94)        | 0.68 (0.27-1.72)        |
| Shift or night work               |                         |                         |                         |                         |
| - No-No                           | 1                       | 1                       | 1                       | 1                       |
| - No-Yes ("Increased")            | 1.12 (0.54-2.30)        | 1.12 (0.60-2.10)        | 0.66 (0.18-2.48)        | N/A <sup>b</sup>        |
| - Yes-No ("Decreased")            | 0.89 (0.35-2.27)        | 1.27 (0.64-2.51)        | 1.31 (0.53-3.24)        | 0.32 (0.04-2.69)        |
| - Yes-Yes                         | 1.34 (0.45-4.03)        | 1.05 (0.42-2.64)        | 0.66 (0.17-2.58)        | 1.49 (0.17-12.7)        |
| Co-habiting<br>("Marital status") |                         |                         |                         |                         |
| - No-No                           | 1                       | 1                       | 1                       | 1                       |
| - No-Yes                          | 0.73 (0.35-1.51)        | 0.65 (0.37-1.16)        | 0.67 (0.23-1.96)        | 2.53 (0.47-13.6)        |
| - Yes-No                          | 0.71 (0.27-1.83)        | 0.52 (0.25-1.12)        | <b>0.35 (0.14-0.84)</b> | 0.49 (0.15-1.67)        |
| - Yes-Yes                         | <b>0.48 (0.23-0.97)</b> | <b>0.43 (0.25-0.72)</b> | <b>0.55 (0.34-0.90)</b> | 0.63 (0.32-1.24)        |
| Children at home                  |                         |                         |                         |                         |
| - No-No                           | 1                       | 1                       | 1                       | 1                       |
| - No-Yes ("Increased")            | 1.29 (0.71-2.35)        | <b>1.78 (1.08-2.93)</b> | 2.45 (0.78-7.70)        | 0.79 (0.10-6.43)        |
| - Yes-No ("Decreased")            | 0.72 (0.15-3.36)        | 0.74 (0.40-1.37)        | 1.38 (0.82-2.32)        | 1.53 (0.74-3.16)        |
| - Yes-Yes                         | 0.93 (0.47-1.83)        | 1.03 (0.63-1.69)        | <b>2.44 (1.39-4.28)</b> | <b>4.71 (1.79-12.4)</b> |

<sup>a</sup>Adjusted for all the variables in the table.

<sup>b</sup>Too few subjects for analysis.

Adj. OR = adjusted odds ratio; CI = confidence interval.
